# Supplementary material for: Phylogeography and Genetic Diversity of Francisella tularensis subsp. holarctica in France (1947–2018)
Source: PubMed Central journal article supplement (PMC7064806; doi:10.3389/fmicb.2020.00287), 2020-03-04
Supplement: Image_2.pdf [file Image_2.pdf]

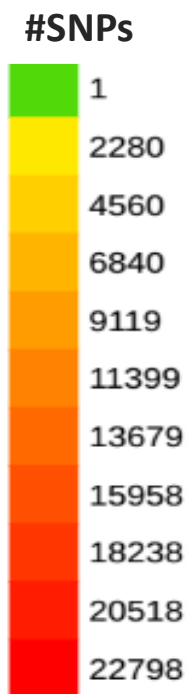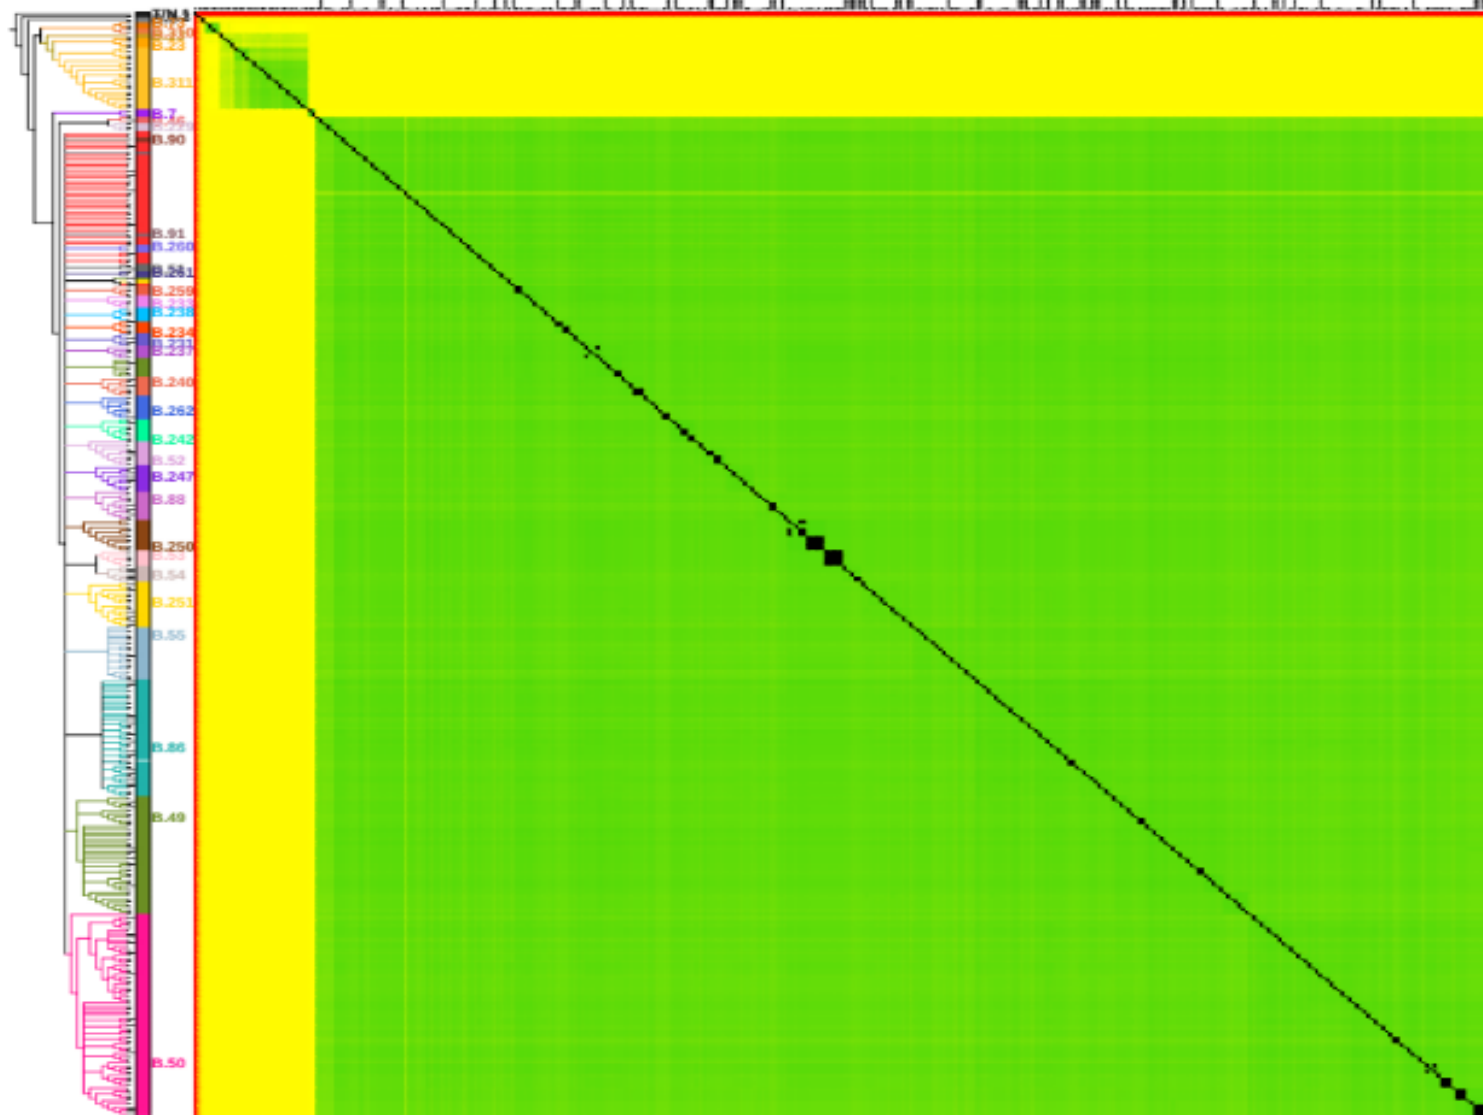

Figure S2. Heatmap representing the genetic distance between each pair of strains (SNP matrix). Phylogenetic tree is associated with colors corresponding to genetic clades (D4).
